# Supplementary material
Source: PubMed Central journal article supplement (PMC3900311)
Supplement: NIHMS531039-supplement-02.pdf [file NIHMS531039-supplement-02.pdf]

## Supplemental Fig 2

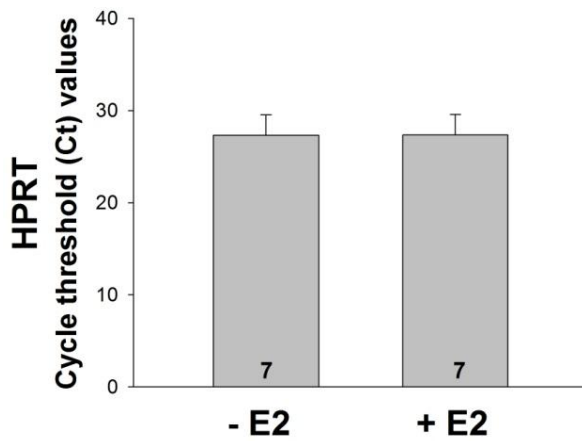

### Supplemental Fig.2.

Silastic tubing containing oil or E2 was implanted in ovariectomized female mice. After 7 days the animals were sacrificed, uteri were removed, RNA was extracted, and cDNA was prepared for Real-Time PCR analysis. No change in HPRT CT values was observed in the uteri of oil- and E2-treated mice.
